# Supplementary material for: Total hip arthroplasty performed in summer is not associated with increased risk of revision due to prosthetic joint infection: a cohort study on 58 449 patients with osteoarthritis from the Danish Hip Arthroplasty Register
Source: Copernicus journal article supplement (doi:10.5194/jbji-9-1-2024), 2024-01-23
Supplement: Supplementary file [file jbji-9-1-2024-supplement.pdf]

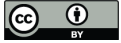

*Supplement of*

**Total hip arthroplasty performed in summer is not associated with increased risk of revision due to prosthetic joint infection: a cohort study on 58 449 patients with osteoarthritis from the Danish Hip Arthroplasty Register**

**Rajzan Joanroy et al.**

*Correspondence to:* Rajzan Joanroy ([rajzan.joanroy2@rsyd.dk](mailto:rajzan.joanroy2@rsyd.dk))

The copyright of individual parts of the supplement might differ from the article licence.

## Supplementary tables

**Table S1. Relative risk (RR) for revision due to prosthetic joint infection (PJI)<sup>1</sup> at 1 year by season of primary total hip arthroplasty (THA) with 95 % confidence interval (CI) stratified by patient characteristics**

| Covariates         | Revisions | Crude RR (95% CI)               |                              | P value | Adjusted <sup>2</sup> RR (95% CI) |                              | P value (Adjusted RR) |
|--------------------|-----------|---------------------------------|------------------------------|---------|-----------------------------------|------------------------------|-----------------------|
|                    |           | Summer <sup>3</sup> (n= 17,623) | Rest of the year (n= 40,826) |         | Summer <sup>3</sup> (n= 17,623)   | Rest of the year (n= 40,826) |                       |
| <b>Sex</b>         |           |                                 |                              |         |                                   |                              |                       |
| Female             | 262       | 1.1 (0.8-1.4)                   | 1.0 (ref)                    | 0.647   | 1.1 (0.8-1.4)                     | 1.0 (ref)                    | 0.635                 |
| Male               | 274       | 1.1 (0.9-1.5)                   | 1.0 (ref)                    | 0.293   | 1.1 (0.9-1.5)                     | 1.0 (ref)                    | 0.324                 |
| <b>Age (years)</b> |           |                                 |                              |         |                                   |                              |                       |
| ≥65                | 396       | 1.0 (0.8-1.3)                   | 1.0 (ref)                    | 0.733   | 1.0 (0.8-1.3)                     | 1.0 (ref)                    | 0.702                 |
| <65                | 140       | 1.3 (0.9-1.8)                   | 1.0 (ref)                    | 0.187   | 1.3 (0.9-1.8)                     | 1.0 (ref)                    | 0.168                 |
| <b>Comorbidity</b> |           |                                 |                              |         |                                   |                              |                       |
| No comorbidity     | 376       | 1.1 (0.9-1.4)                   | 1.0 (ref)                    | 0.319   | 1.1 (0.9-1.4)                     | 1.0 (ref)                    | 0.305                 |
| Any comorbidity    | 160       | 1.0 (0.7-1.5)                   | 1.0 (ref)                    | 0.798   | 1.0 (0.7-1.5)                     | 1.0 (ref)                    | 0.777                 |

<sup>1</sup>≥2 culture-positive biopsies for the same bacteria or reported PJI in Danish hip arthroplasty register  
<sup>2</sup>Adjusted for age groups, sex, Charlson Comorbidity Index, cohabitation status, prosthesis fixation type and duration of antibiotic treatment in relation to primary THA.  
<sup>3</sup>Summer, June-September.
